# Supplementary material for: Towards Complete Tumor Resection: Novel Dual-Modality Probes for Improved Image-Guided Surgery of GRPR-Expressing Prostate Cancer
Source: MDPI journal article supplement (doi:10.3390/pharmaceutics14010195), 2022-01-14
Supplement: s1 [file s1]

# Supplementary Materials: Towards Complete Tumor Resection: Novel Dual-modality Probes for Improved Image-guided Surgery of GRPR-expressing Prostate Cancer

Maryana Handula, Marjolein Verhoeven, Kuo-Ting Chen, Joost Haeck, Marion de Jong, Simone U. Dalm and Yann Seimbille

## Tetrazine-Sulfo Cyanine 5 (Tz-sCy5)

**Tz-sCy5** was obtained as a blue solid (13.11 mg, 63% yield). Analytical HPLC retention time:  $t_R = 15.20$  min. Purity > 94%. ESI-MS:  $m/z$ , calculated: 811.28 [M], found: 834.01 [M+Na]<sup>+</sup>. <sup>1</sup>H NMR (400 MHz, D<sub>2</sub>O):  $\delta$  10.00 (s, 1H), 7.84 (d, 2H,  $J = 7.7$  Hz), 7.56-7.72 (m, 5H), 6.97-7.13 (m, 4H), 6.08 (t, 1H,  $J = 11.4$  Hz), 5.83 (d, 1H,  $J = 13.2$  Hz), 5.73 (d, 1H,  $J = 12.2$  Hz), 4.20 (s, 2H), 3.77 (s, 1H), 3.63 (qt, 2H,  $J = 13.6, 6.7$  Hz), 3.24 (s, 2H), 3.12 (q, 2H,  $J = 7.5$  Hz), 2.17 (br, 1H), 1.52 (br, 2H), 1.29 (s, 3H), 1.27 (s, 6H), 1.25 (s, 6H).

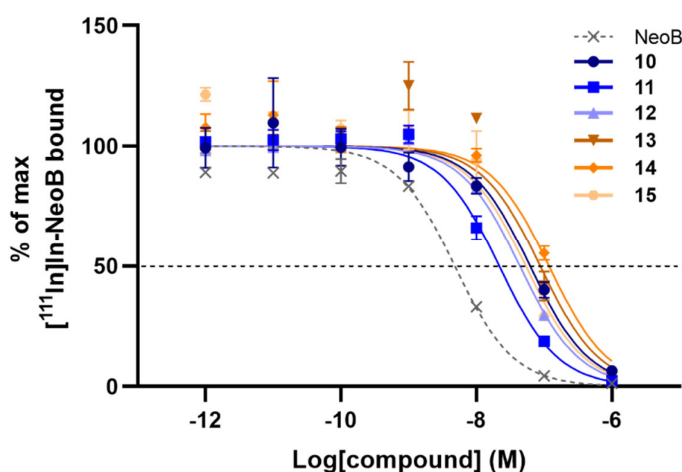

**Figure S1.** Inhibition of [<sup>111</sup>In]In-NeoB binding to PC-3 cells with probes 10, 11, 12, 13, 14, 15 and NeoB (as positive control). The dotted black line at 50% crosses the curves at the IC<sub>50</sub> values. Data are presented as the average value of three wells.

**Table S1.** Biodistribution of [<sup>111</sup>In]In-12 and [<sup>111</sup>In]In-15 in PC-3 xenograft Balb/c nu/nu mice after SPECT/CT scanning. The uptake values are expressed as percentage injected dose per gram tissue (%ID/g).

| Organ/tissue                 | [ <sup>111</sup> In]In-12 |                    | [ <sup>111</sup> In]In-15 |                    |
|------------------------------|---------------------------|--------------------|---------------------------|--------------------|
|                              | Non-blocked<br>(n = 3)    | Blocked<br>(n = 1) | Non-blocked<br>(n = 3)    | Blocked<br>(n = 1) |
| Blood                        | 7.83 ± 0.84               | 7.31               | 18.32 ± 2.12              | 13.87              |
| Tumor                        | 8.47 ± 0.46               | 2.72               | 6.90 ± 0.81               | 4.39               |
| Pancreas                     | 16.55 ± 1.41              | 1.26               | 9.72 ± 1.63               | 1.49               |
| Prostate                     | 3.56 ± 1.62               | 4.36               | 3.27 ± 0.74               | 1.42               |
| Liver                        | 15.35 ± 0.43              | 20.04              | 8.87 ± 0.65               | 8.93               |
| Spleen                       | 4.11 ± 0.94               | 3.32               | 5.86 ± 1.70               | 5.05               |
| Stomach                      | 3.22 ± 0.54               | 3.12               | 4.40 ± 1.04               | 3.48               |
| Small intestine              | 4.40 ± 2.45               | 1.45               | 3.79 ± 0.69               | 1.97               |
| Cecum                        | 3.73 ± 0.40               | 2.35               | 5.21 ± 1.94               | 2.31               |
| Large intestine              | 3.88 ± 0.40               | 2.06               | 5.60 ± 1.44               | 2.35               |
| Kidneys                      | 24.88 ± 2.78              | 17.11              | 15.38 ± 0.50              | 18.19              |
| Lungs                        | 6.51 ± 1.15               | 16.14              | 6.77 ± 1.73               | 18.95              |
| Heart                        | 2.39 ± 0.23               | 2.24               | 5.43 ± 0.69               | 3.27               |
| Muscle                       | 0.96 ± 0.16               | 1.04               | 1.10 ± 0.09               | 1.28               |
| Bone                         | 2.03 ± 0.89               | 1.87               | 3.05 ± 0.74               | 2.82               |
| Brain                        | 0.20 ± 0.03               | 0.20               | 0.67 ± 0.28               | 0.51               |
| <i>Tumor-to-organ ratios</i> |                           |                    |                           |                    |
| Tumor-to-blood               | 1.09 ± 0.15               | 0.37               | 0.38 ± 0.04               | 0.32               |
| Tumor-to-pancreas            | 0.51 ± 0.03               | 2.16               | 0.72 ± 0.08               | 2.95               |
| Tumor-to-prostate            | 2.86 ± 1.58               | 0.62               | 2.16 ± 0.46               | 3.09               |
| Tumor-to-liver               | 0.55 ± 0.04               | 0.14               | 0.78 ± 0.04               | 0.49               |
| Tumor-to-kidney              | 0.34 ± 0.05               | 0.16               | 0.45 ± 0.04               | 0.24               |
| Tumor-to-muscle              | 9.04 ± 1.74               | 2.62               | 6.27 ± 0.44               | 3.42               |

**Table S2.** Fluorescent signal of [<sup>111</sup>In]In-12 and [<sup>111</sup>In]In-15 in organ/tissue samples after dissection. The signal is expressed as average radiant efficiency in 10<sup>8</sup> p/sec/cm<sup>2</sup>/sr per μW/cm<sup>2</sup>.

| Organ/tissue                 | [ <sup>111</sup> In]In-12 |                    | [ <sup>111</sup> In]In-15 |                    |
|------------------------------|---------------------------|--------------------|---------------------------|--------------------|
|                              | Non-blocked<br>(n = 3)    | Blocked<br>(n = 1) | Non-blocked<br>(n = 3)    | Blocked<br>(n = 1) |
| Tumor                        | 4.31 ± 1.03               | 1.67               | 4.66 ± 1.35               | 1.47               |
| Pancreas                     | 6.32 ± 0.50               | 0.66               | 5.12 ± 1.93               | 1.17               |
| Liver                        | 2.20 ± 0.09               | 2.42               | 2.38 ± 0.21               | 1.75               |
| Small intestine              | 0.85 ± 0.30               | 0.44               | 0.85 ± 0.04               | 0.38               |
| Large intestine              | 0.68 ± 0.19               | 0.47               | 0.94 ± 0.28               | 0.49               |
| Kidneys                      | 9.41 ± 0.92               | 5.42               | 7.80 ± 0.92               | 6.09               |
| Lungs                        | 1.93 ± 0.18               | 2.88               | 2.25 ± 0.70               | 2.93               |
| Muscle                       | 0.78 ± 0.08               | 0.76               | 1.08 ± 0.16               | 0.96               |
| Bone                         | 0.40 ± 0.11               | 0.32               | 0.74 ± 0.24               | 0.55               |
| <i>Tumor-to-organ ratios</i> |                           |                    |                           |                    |
| Tumor-to-pancreas            | 0.69 ± 0.22               | 2.54               | 0.95 ± 0.18               | 1.25               |
| Tumor-to-liver               | 1.96 ± 0.47               | 0.69               | 1.96 ± 0.57               | 0.84               |
| Tumor-to-kidney              | 0.47 ± 0.16               | 0.31               | 0.59 ± 0.14               | 0.24               |
| Tumor-to-muscle              | 5.69 ± 1.94               | 2.21               | 4.50 ± 1.87               | 1.54               |
